# Supplementary material for: Cryptococcal Meningitis in Kidney Transplant Recipients: A Two-Decade Cohort Study in France
Source: MDPI journal article supplement (doi:10.3390/pathogens11060699), 2022-06-17
Supplement: s1 [file s1]

**Table S1.** Summary table of the clinical evolution of patients with induction treatment outside Guidelines

| <b>Induction treatment</b>                | <b>N</b> | <b>Alive at M12</b> |
|-------------------------------------------|----------|---------------------|
| Fluconazole or Voriconazole               | 6        | 2/6                 |
| Flucytosine + Voriconazole or Fluconazole | 4        | 3/4                 |
| Amphotericine B (liposomale)              | 2        | 2/2                 |
