# Supplementary material for: Cryptococcal Meningitis in Kidney Transplant Recipients: A Two-Decade Cohort Study in France
Source: MDPI journal article supplement (doi:10.3390/pathogens11060699), 2022-06-17
Supplement: s1 [file s1]

**Table S2.** Neurological symptoms based on the detection of vascular injury on brain imaging

|                                  | <b>No Vascular injury n=49</b> | <b>Vascular injury n=10</b> | <b>p-value</b> |
|----------------------------------|--------------------------------|-----------------------------|----------------|
| Fever, No (%)                    | 29 (59.2%)                     | 8 (80.0%)                   | 0.294          |
| Headache, No (%)                 | 26 (53.1%)                     | 5 (50.0%)                   | 1.000          |
| Focal neurological signs, No (%) | 13 (26.5%)                     | 5 (50.0%)                   | 0.256          |
| Dizziness, No (%)                | 6 (12.2%)                      | 1 (10.0%)                   | 1.000          |
| Blurred vision, No (%)           | 4 (8.16%)                      | 2 (20.0%)                   | 0.266          |
| Seizures, No (%)                 | 5 (10.2%)                      | 1 (10.0%)                   | 1.000          |
| Confusion, No (%)                | 12 (24.5%)                     | 2 (20.0%)                   | 1.000          |
