# Supplementary material for: Cryptococcal Meningitis in Kidney Transplant Recipients: A Two-Decade Cohort Study in France
Source: MDPI journal article supplement (doi:10.3390/pathogens11060699), 2022-06-17
Supplement: s1 [file s1]

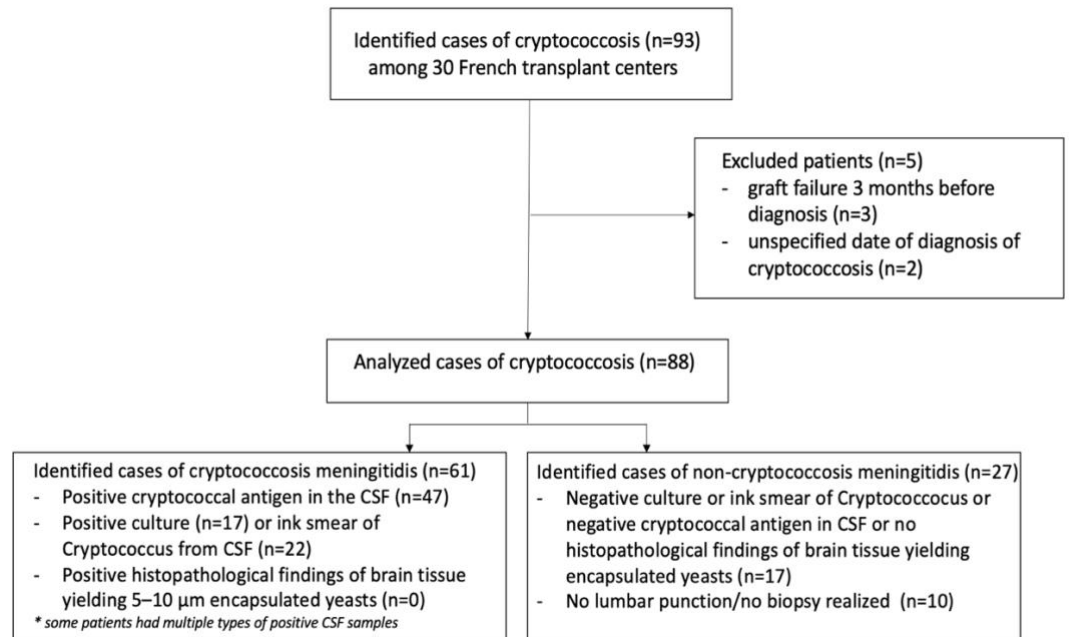

**Figure S1.** Ninety-three patients were identified, 3 were excluded due to graft failure 3 months before diagnosis and 2 were excluded due to an unspecified date of diagnosis of cryptococcosis. A total of 88 cases were included in the final analysis.
