# Supplementary material for: Cryptococcal Meningitis in Kidney Transplant Recipients: A Two-Decade Cohort Study in France
Source: MDPI journal article supplement (doi:10.3390/pathogens11060699), 2022-06-17
Supplement: s1 [file s1]

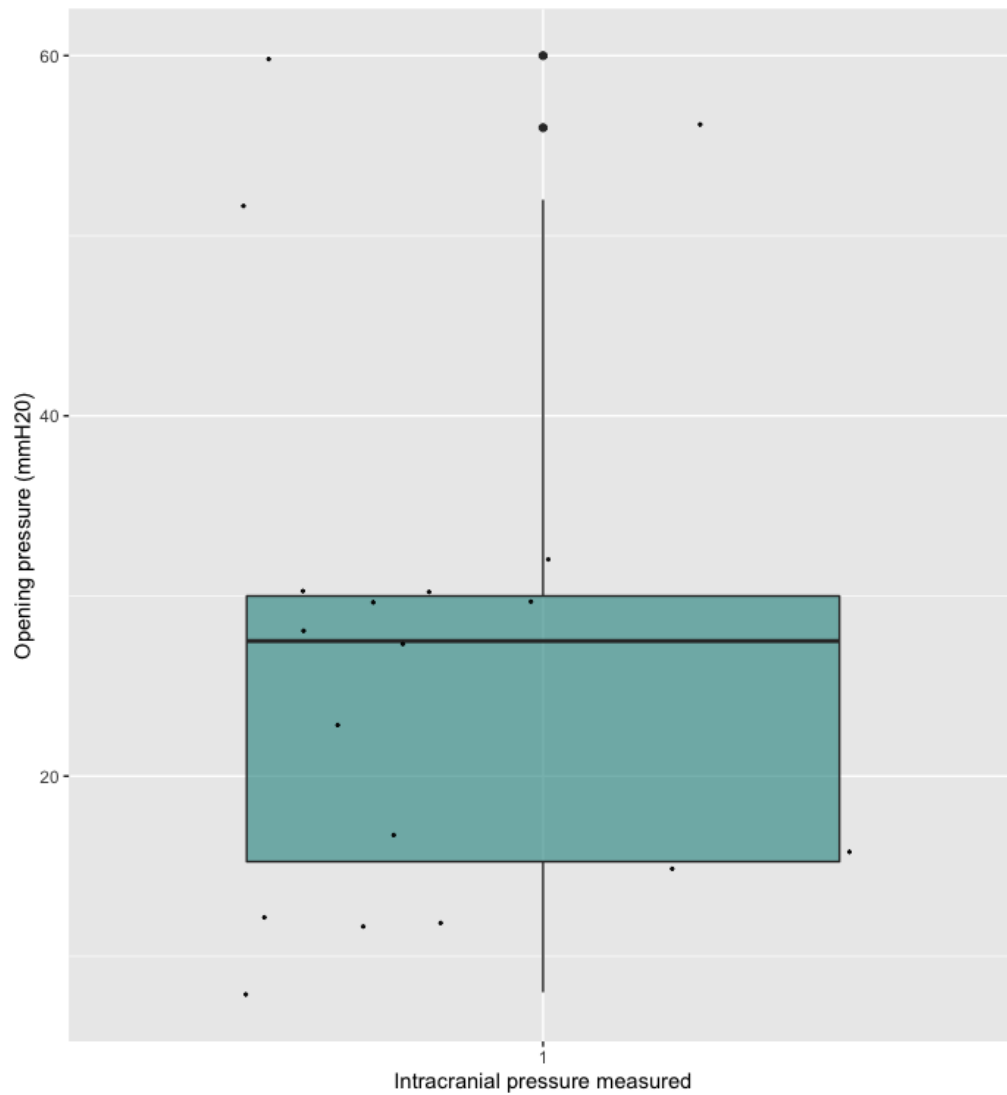

**Figure S2.** Measurement of intracranial opening pressure was only reported in 26.5% of cases ( $n = 18/68$ ) and 26.2% of CM cases. When performed, pressure was found to be elevated in 83.3% of cases, with a median pressure of 27.5 cmH2O [15-30]. Regarding patients with CM, pressure was found to be elevated in 93.7% of CM cases, with a median pressure of 30 cmH2O [16-32].
