# Supplementary material for: Cryptococcal Meningitis in Kidney Transplant Recipients: A Two-Decade Cohort Study in France
Source: MDPI journal article supplement (doi:10.3390/pathogens11060699), 2022-06-17
Supplement: s1 [file s1]

**Table S3.** Neurological symptoms based on the detection of hydrocephalus on brain imaging

|                                     | <b>No hydrocephalus<br/>n=56</b> | <b>Hydrocephalus<br/>n=3</b> | <b>p-value</b> |
|-------------------------------------|----------------------------------|------------------------------|----------------|
| Fever, No (%)                       | 36 (64.3%)                       | 1 (33.3%)                    | 0.549          |
| Headache, No (%)                    | 30 (53.6%)                       | 1 (33.3%)                    | 0.599          |
| Focal neurological<br>signs, No (%) | 17 (30.4%)                       | 1 (33.3%)                    | 1.000          |
| Dizziness, No (%)                   | 6 (10.7%)                        | 1 (33.3%)                    | 0.320          |
| Blurred vision, No<br>(%)           | 6 (10.7%)                        | 0 (0.0%)                     | 1.000          |
| Seizures, No (%)                    | 6 (10.7%)                        | 0 (0.0%)                     | 1.000          |
| Confusion, No (%)                   | 13 (23.2%)                       | 1 (33.3%)                    | 0.564          |
