# Supplementary figures and images for: Cryptococcal Meningitis in Kidney Transplant Recipients: A Two-Decade Cohort Study in France
Source: MDPI journal article supplement (doi:10.3390/pathogens11060699), 2022-06-17

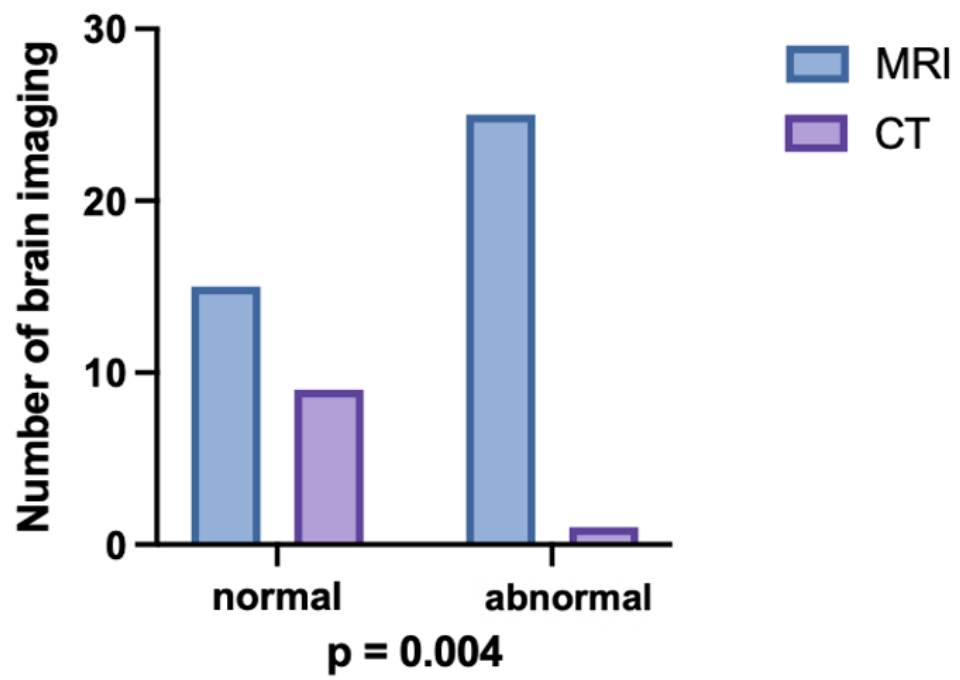

Figure S4. Results of brain imaging by type for CM patients

Supplement: s1 [file s1]

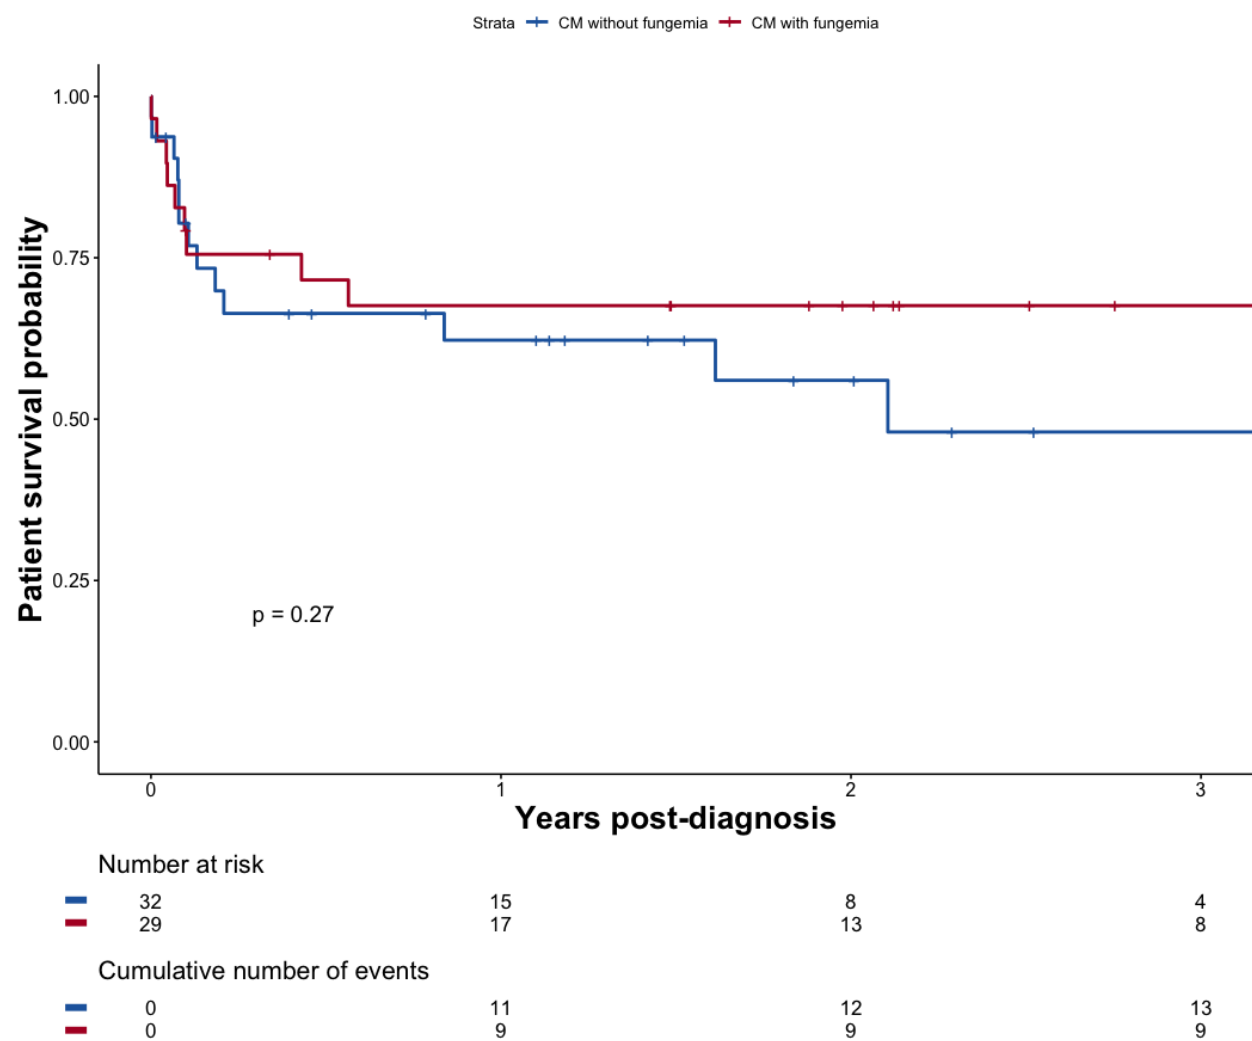

**Figure S3.** Patient survival probability after diagnosis of Cryptococcosis with fungemia.

Supplement: s1 [file s1]
